# Supplementary material for: Machine-learning assisted multiplex detection of catecholamine neurotransmitters with a colorimetric sensor array
Source: Royal Society of Chemistry journal article supplement (doi:10.1039/d2ay01797k), 2023-01-01
Supplement: d2ay01797k1.pdf [file d2ay01797k1.pdf]

## Supplementary Information

# Machine-Learning Assisted Multiplex Detection of Catecholamine Neurotransmitters with a Colorimetric Sensor Array

**M. Hassani-Marand**<sup>a</sup>, **N. Fahimi-Kashani**<sup>b</sup> and **M. R. Hormozi-Nezhad**<sup>a,c\*</sup>

<sup>a</sup> Institute for Nanoscience and Nanotechnology, Sharif University of Technology, Tehran, 14588-89694, Iran

<sup>b</sup> Department of Chemistry, Isfahan University of Technology, Isfahan, 84156-83111, Iran

<sup>c</sup> Department of Chemistry, Sharif University of Technology, Tehran, 11155-9516, Iran

\*Email: [nfahimi@iut.ac.ir](mailto:nfahimi@iut.ac.ir)  
[hormozi@sharif.edu](mailto:hormozi@sharif.edu)

### Table of Contents

|                                                                                                                                                                                                                                                                                          |            |
|------------------------------------------------------------------------------------------------------------------------------------------------------------------------------------------------------------------------------------------------------------------------------------------|------------|
| <b>Fig. S1.</b> TEM images of Citrate-capped (Cit-) AuNPs in absence <b>(A)</b> and presence <b>(C)</b> of DA. TEM images of Borohydride-capped (BH <sub>4</sub> <sup>-</sup> ) AuNPs in absence <b>(B)</b> and presence <b>(D)</b> of DA                                                | <b>S5</b>  |
| <b>Fig. S2.</b> Chemical structure and pK <sub>a</sub> values of <b>(A)</b> DA, <b>(B)</b> EP, <b>(C)</b> NEP, and <b>(D)</b> LD.                                                                                                                                                        | <b>S6</b>  |
| <b>Fig. S3.</b> The stability of <b>(A)</b> SE1 (Cit-AuNPs in Phosphate Buffer pH 7.0), <b>(B)</b> SE2 (BH <sub>4</sub> <sup>-</sup> AuNPs in Citrate Buffer pH 4.5), and <b>(C)</b> SE3 (BH <sub>4</sub> <sup>-</sup> AuNPs in Phosphate Buffer pH 7.0) in the 5-minute time intervals. | <b>S7</b>  |
| <b>Fig. S4.</b> The predominant forms of <b>(A)</b> DA, <b>(B)</b> EP, <b>(C)</b> NEP, and <b>(D)</b> LD at different pH values.                                                                                                                                                         | <b>S8</b>  |
| <b>Fig. S5.</b> DLS measurements of SE2 (BH <sub>4</sub> <sup>-</sup> AuNPs pH 4.5) in the absence <b>(A)</b> and in the presence of 5 μM of <b>(B)</b> DA and <b>(C)</b> LD after 20 min. The colorful spots show the corresponding images taken from the solutions.                    | <b>S9</b>  |
| <b>Fig. S6.</b> The variation of time-cyclic UV-Vis spectra of SE1, SE2, and SE3 (in order from left to right) upon the addition of <b>(A-C)</b> DA, <b>(D-F)</b> EP, <b>(G-I)</b> NEP, and <b>(J-L)</b> LD at a concentration of 50 μM.                                                 | <b>S10</b> |
| <b>Fig. S7.</b> UV-Vis spectra of <b>(A)</b> SE1 <b>(B)</b> SE2, and <b>(C)</b> SE3 in the presence of dopamine in                                                                                                                                                                       | <b>S11</b> |

|                                                                                                                                                                                                                                                                                                                                                                                                                                                                                                                                                                                                                                                                                                                                                                                  |            |
|----------------------------------------------------------------------------------------------------------------------------------------------------------------------------------------------------------------------------------------------------------------------------------------------------------------------------------------------------------------------------------------------------------------------------------------------------------------------------------------------------------------------------------------------------------------------------------------------------------------------------------------------------------------------------------------------------------------------------------------------------------------------------------|------------|
| the concentration range of 0 – 1000 $\mu$ M after 20min.                                                                                                                                                                                                                                                                                                                                                                                                                                                                                                                                                                                                                                                                                                                         |            |
| <b>Fig. S8.</b> UV-Vis spectra of <b>(A)</b> SE1 <b>(B)</b> SE2, and <b>(C)</b> SE3 in the presence of epinephrine in the concentration range of 0 – 1000 $\mu$ M after 20min.                                                                                                                                                                                                                                                                                                                                                                                                                                                                                                                                                                                                   | <b>S12</b> |
| <b>Fig. S9.</b> UV-Vis spectra of <b>(A)</b> SE1 <b>(B)</b> SE2, and <b>(C)</b> SE3 in the presence of norepinephrine in the concentration range of 0 – 1000 $\mu$ M after 20min.                                                                                                                                                                                                                                                                                                                                                                                                                                                                                                                                                                                                | <b>S13</b> |
| <b>Fig. S10.</b> UV-Vis spectra of <b>(A)</b> SE1 <b>(B)</b> SE2, and <b>(C)</b> SE3 in the presence of levodopa in the concentration range of 0 – 1000 $\mu$ M after 20min.                                                                                                                                                                                                                                                                                                                                                                                                                                                                                                                                                                                                     | <b>S14</b> |
| <b>Fig. S11.</b> UV-Vis spectra of <b>(A)</b> SE1 <b>(B)</b> SE2, and <b>(C)</b> SE3 in the presence of uric acid in the concentration range of 0 – 1000 $\mu$ M after 20min.                                                                                                                                                                                                                                                                                                                                                                                                                                                                                                                                                                                                    | <b>S15</b> |
| <b>Fig. S12.</b> Heatmap showing cross-reactivity in the arrays' response. Visual encoding of the arrays' response at different concentrations for <b>(A)</b> DA, <b>(B)</b> EP, <b>(C)</b> NEP, and <b>(D)</b> LD.                                                                                                                                                                                                                                                                                                                                                                                                                                                                                                                                                              | <b>S16</b> |
| <b>Fig. S13.</b> 3D LDA score plot showing the discrimination between pure and mixture forms of the CNs ( <b>Mix1</b> DA5:EP5; <b>Mix2</b> DA1:EP5; <b>Mix3</b> DA1:NEP5; <b>Mix4</b> DA5:NEP1; <b>Mix5</b> DA1:NEP0.6; <b>Mix6</b> DA0.6:NEP0.6; <b>Mix7</b> DA0.6:EP0.6; <b>Mix8</b> EP5:NEP5; <b>Mix9</b> EP0.6:NEP1; <b>Mix10</b> EP10:NEP1; <b>Mix11</b> DA1:LD100; <b>Mix12</b> EP5:LD60; <b>Mix13</b> NEP1:LD80; <b>Mix14</b> DA1:EP1:NEP1; <b>Mix15</b> DA0.6:EP1:NEP5; <b>Mix16</b> DA1:EP0.6:NEP1; <b>Mix17</b> DA1:EP0.6:LD20; <b>Mix18</b> EP0.6:NEP0.6:LD40; <b>Mix19</b> DA0.6:NEP1:LD80; <b>Mix20</b> DA5:EP5:NEP5:LD5; <b>Mix21</b> DA1:EP1:NEP1:LD10; <b>Mix22</b> DA0.6:EP0.6:NEP1:LD5; <b>Mix23</b> DA1:EP0.6:NEP1:LD1). Concentrations are given in $\mu$ M. | <b>S17</b> |
| <b>Fig. S14.</b> 3D LDA score plot showing the discrimination between the analytes in their concentration ranges: <b>DA</b> (1 - 12); <b>EP</b> (3.6 - 9); <b>NEP</b> (3 - 12); and <b>LD</b> (10 - 70) in the human urine sample. Concentrations are given in $\mu$ M. Samples with the symbol -t were introduced into the LDA analysis in the form of a test set matrix.                                                                                                                                                                                                                                                                                                                                                                                                       | <b>S18</b> |
| <b>Fig. S15.</b> Multivariate calibration of catecholamine neurotransmitters in the human urine sample with PLSR. The predicted versus measured concentrations for <b>(A)</b> DA, <b>(B)</b> EP, <b>(C)</b> NEP, and <b>(D)</b> LD. The data was randomly split into 80% calibration (red spots) and 20% prediction (blue spots) sets.                                                                                                                                                                                                                                                                                                                                                                                                                                           | <b>S19</b> |

|                                                                                                                                                                                                                                                                                                                                                                                                                                                                                                                                                                                                                                                                                                                                                                                             |                       |
|---------------------------------------------------------------------------------------------------------------------------------------------------------------------------------------------------------------------------------------------------------------------------------------------------------------------------------------------------------------------------------------------------------------------------------------------------------------------------------------------------------------------------------------------------------------------------------------------------------------------------------------------------------------------------------------------------------------------------------------------------------------------------------------------|-----------------------|
| <p><b>Fig. S16.</b> UV-Vis spectra of (A) SE1 (B) SE2, and (C) SE3 in the presence of 50 <math>\mu\text{M}</math> uric acid(UA, red), urea (U, light orange), creatinine (Cr, yellow), sodium (<math>\text{Na}^+</math>, light green), calcium (<math>\text{Ca}^{2+}</math>, dark green), potassium (<math>\text{K}^+</math>, light blue), chloride (<math>\text{Cl}^-</math>, light purple), carbonate (<math>\text{CO}_3^{2-}</math>, dark blue), , phosphate (<math>\text{PO}_4^{3-}</math>, purple), dopamine (DA, dark orange), epinephrine (EP, dark pink), norepinephrine (NEP, neon green) and levodopa (LD, pink) after 20min.</p>                                                                                                                                                 | <p><b>S20</b></p>     |
| <p><b>Table S1.</b> Concentration of CNs in Real sample analysis.</p>                                                                                                                                                                                                                                                                                                                                                                                                                                                                                                                                                                                                                                                                                                                       | <p><b>S21</b></p>     |
| <p><b>Table S2.</b> Sensing strategies for determination of CNs.</p>                                                                                                                                                                                                                                                                                                                                                                                                                                                                                                                                                                                                                                                                                                                        | <p><b>S22-S23</b></p> |
| <p><b>Table S3.</b> Classification and Jackknifed classification matrix for the discrimination of mixtures of analytes with the following components (<b>Mix1</b> DA5:EP5; <b>Mix2</b> DA1:EP5; <b>Mix3</b> DA1:NEP5; <b>Mix4</b> DA5:NEP1; <b>Mix5</b> DA1:NEP0.6; <b>Mix6</b> DA0.6:NEP0.6; <b>Mix7</b> DA0.6:EP0.6; <b>Mix8</b> EP5:NEP5; <b>Mix9</b> EP0.6:NEP1; <b>Mix10</b> EP10:NEP1; <b>Mix11</b> DA1:LD100; <b>Mix12</b> EP5:LD60; <b>Mix13</b> NEP1:LD80; <b>Mix14</b> DA1:EP1:NEP1; <b>Mix15</b> DA0.6:EP1:NEP5; <b>Mix16</b> DA1:EP0.6:NEP1; <b>Mix17</b> DA1:EP0.6:LD20; <b>Mix18</b> EP0.6:NEP0.6:LD40; <b>Mix19</b> DA0.6:NEP1:LD80; <b>Mix20</b> DA5:EP5:NEP5:LD5; <b>Mix21</b> DA1:EP1:NEP1:LD10; <b>Mix22</b> DA0.6:EP0.6:NEP1:LD5; <b>Mix23</b> DA1:EP0.6:NEP1:LD1).</p> | <p><b>S24-S28</b></p> |
| <p><b>Table S4.</b> Classification and Jackknifed classification matrix for the discrimination of all analytes in their entire concentration range (<b>DA</b> 1 – 12 <math>\mu\text{M}</math>; <b>EP</b> 3.6 – 9 <math>\mu\text{M}</math>; <b>NEP</b> 3 – 12 <math>\mu\text{M}</math>; and <b>LD</b> 10 - 70 <math>\mu\text{M}</math>) in the human urine sample.</p>                                                                                                                                                                                                                                                                                                                                                                                                                       | <p><b>S29</b></p>     |
| <p><b>Table S5.</b> Analytical figures of merit for multivariate calibration of DA, EP, NEP, and LD in a human urine sample with PLSR.</p>                                                                                                                                                                                                                                                                                                                                                                                                                                                                                                                                                                                                                                                  | <p><b>S30</b></p>     |

## **Synthesis of AuNPs with different capping agents**

### **Synthesis of citrate-capped AuNPs (Cit-AuNPs)**

Generally, 50 mL of 1mM  $\text{HAuCl}_4$  solution was prepared and boiled under reflux. While boiling, 5mL of trisodium citrate (38.8 mM) was added to the as-prepared solution under vigorous stirring. The heating and stirring were continued under reflux for a further 30 min. AuNPs formation was revealed by appearing wine red color in the solution.

### **Synthesis of borohydride-capped AuNPs ( $\text{BH}_4$ -AuNPs)**

First, solution 1 containing  $\text{HAuCl}_4$  (50.0 mM) and HCl (50.0 mM) was prepared. Then, 400 $\mu\text{L}$  of the solution consisting of  $\text{NaBH}_4$  (50.0 mM) and NaOH (50.0 mM) was added to 100 $\mu\text{L}$  of solution 1. The resulting solution was stirred at room temperature for 15 minutes after adding 9.6 ml of DI water.

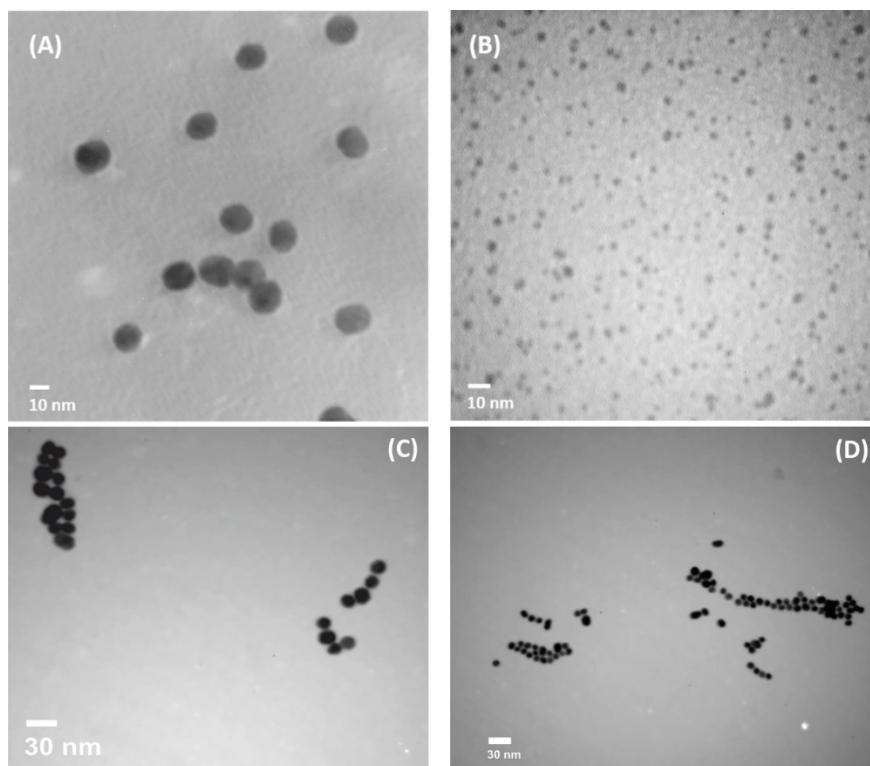

**Fig. S1.** TEM images of Citrate-capped (Cit-) AuNPs in absence **(A)** and presence **(C)** of DA. TEM images of Borohydride-capped (BH<sub>4</sub>-) AuNPs in absence **(B)** and presence **(D)** of DA

(A)

(pKa<sub>1</sub>=9.44)

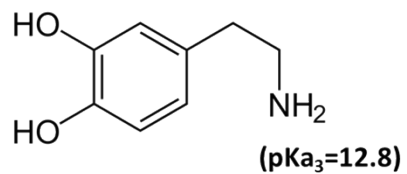

(pKa<sub>2</sub>=10.75)

Dopamine

(B)

(pKa<sub>1</sub>=8.58)

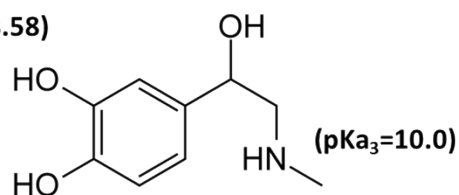

(pKa<sub>2</sub>=8.78)

Epinephrine

(C)

(pKa<sub>1</sub>=8.6)

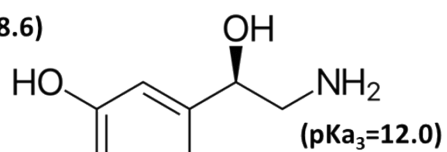

(pKa<sub>2</sub>=9.8)

Norepinephrine

(D)

(pKa<sub>2</sub>=8.7)

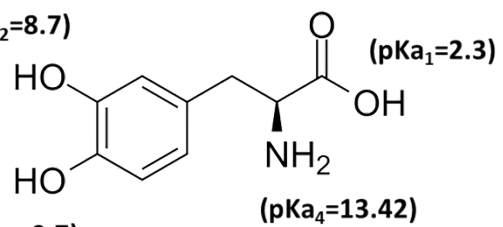

(pKa<sub>3</sub>=9.7)

Levodopa

Fig. S2. Chemical structure and pK<sub>a</sub> values of (A) DA, (B) EP, (C) NEP, and (D) LD.

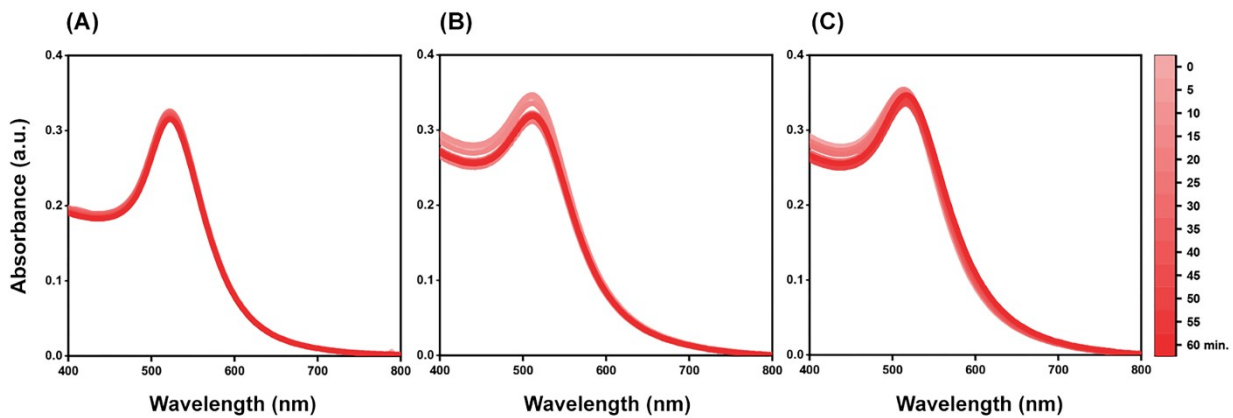

**Fig. S3.** The stability of **(A)** SE1 (Cit-AuNPs in Phosphate Buffer pH 7.0), **(B)** SE2 (BH<sub>4</sub>-AuNPs in Citrate Buffer pH 4.5), and **(C)** SE3 (BH<sub>4</sub>-AuNPs in Phosphate Buffer pH 7.0) in the 5-minute time intervals.

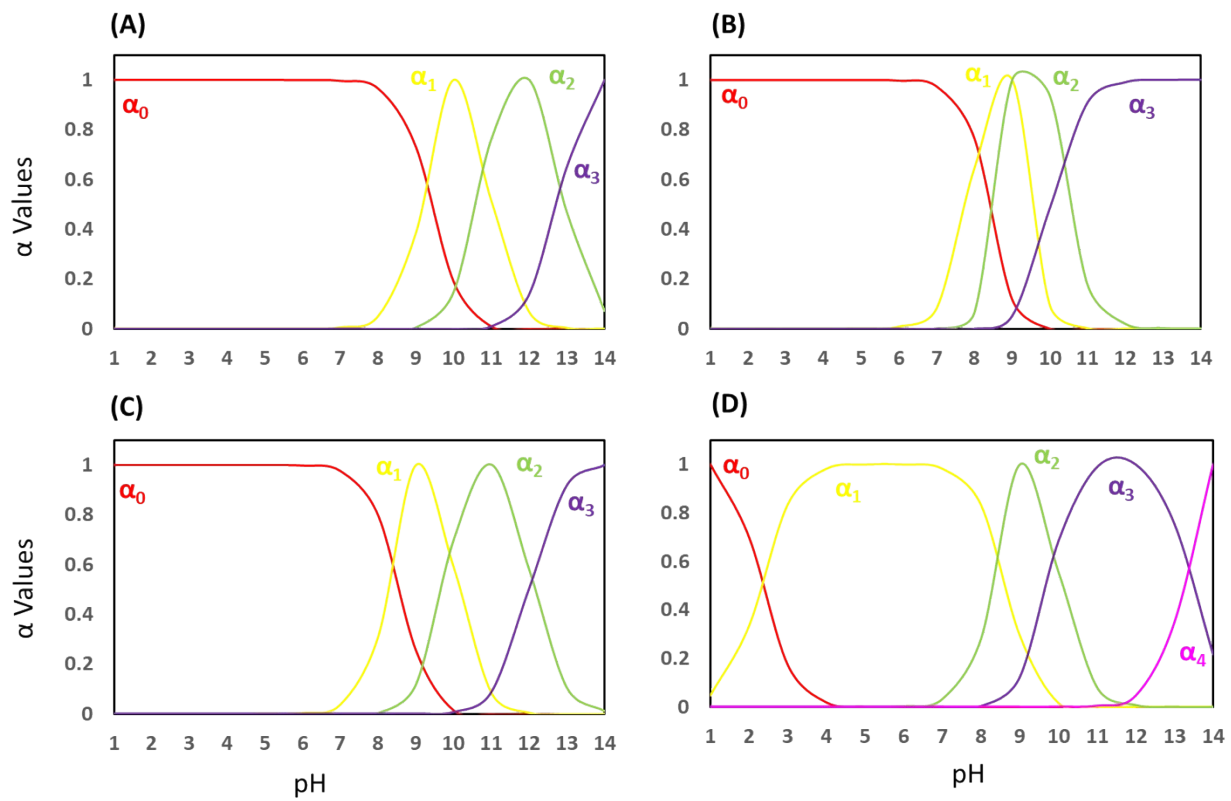

**Fig. S4.** The predominant forms of **(A)** DA, **(B)** EP, **(C)** NEP, and **(D)** LD at different pH values.



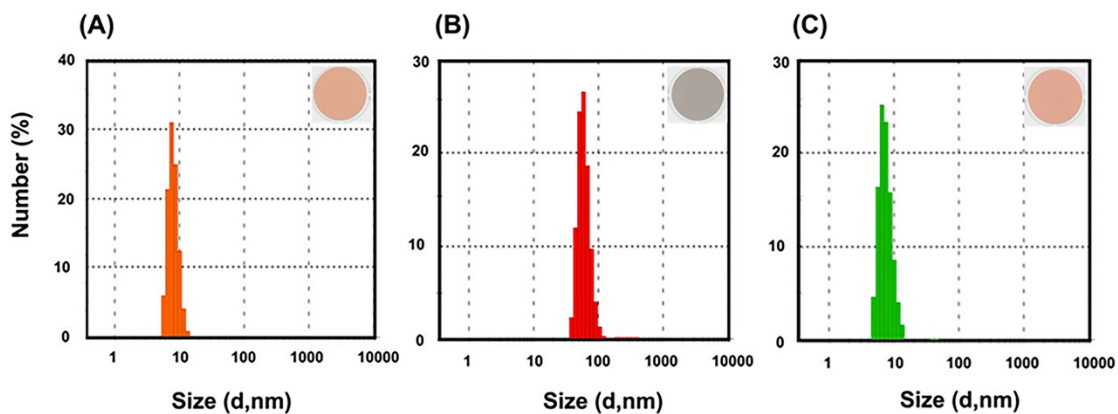

**Fig. S5.** DLS measurements of SE2 ( $\text{BH}_4\text{-AuNPs}$  pH 4.5) in the absence **(A)** and in the presence of  $5\ \mu\text{M}$  of **(B)** DA and **(C)** LD after 20 min. The colorful spots show the corresponding images taken from the solutions.

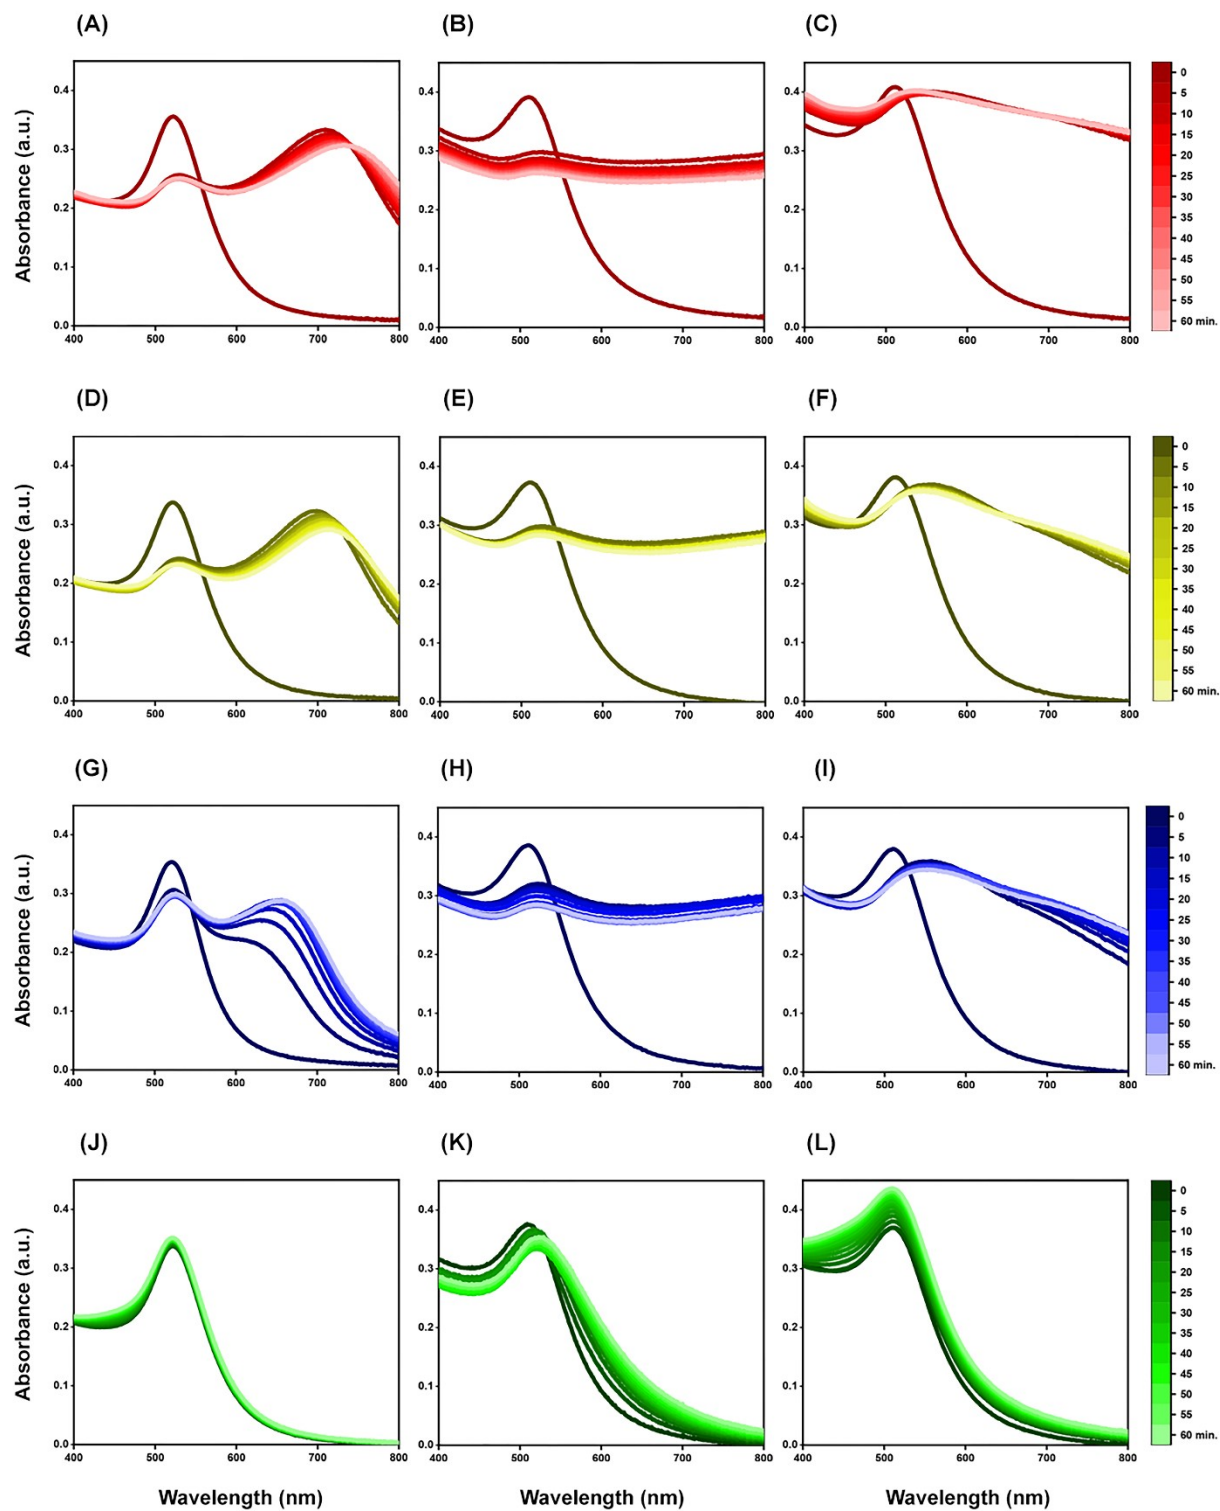

**Fig. S6.** The variation of time-cyclic UV-Vis spectra of SE1, SE2, and SE3 (in order from left to right) upon the addition of **(A-C)** DA, **(D-F)** EP, **(G-I)** NEP, and **(J-L)** LD at a concentration of 50  $\mu\text{M}$ .

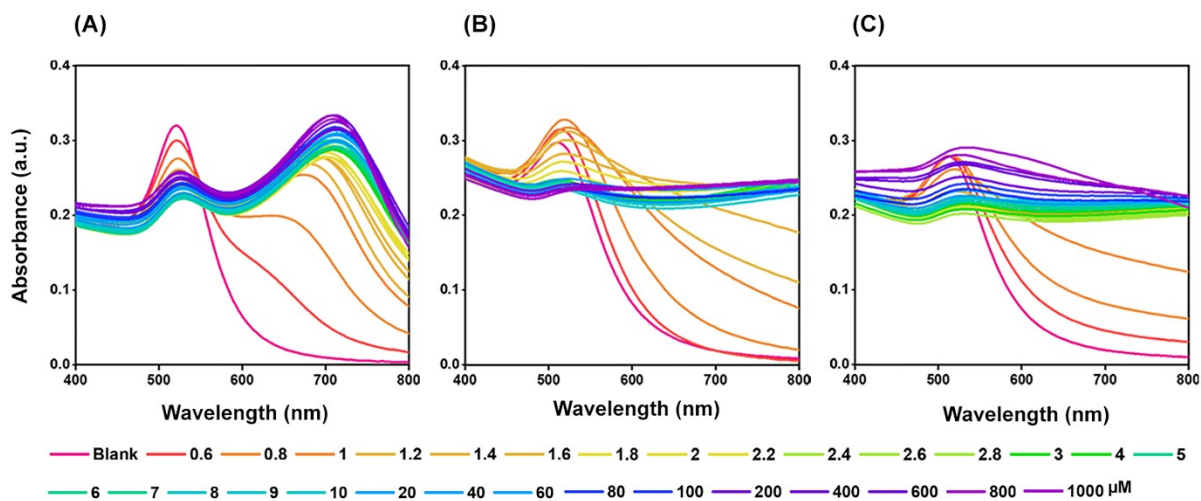

**Fig. S7.** UV-Vis spectra of **(A)** SE1 **(B)** SE2, and **(C)** SE3 in the presence of dopamine in the concentration range of 0 – 1000  $\mu\text{M}$  after 20min.

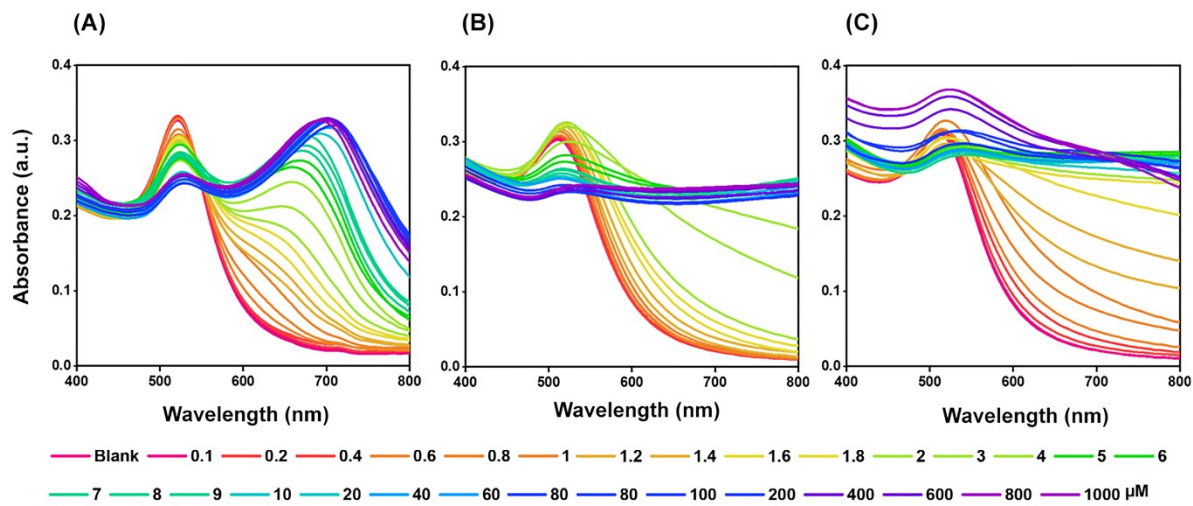

**Fig. S8.** UV-Vis spectra of (A) SE1 (B) SE2, and (C) SE3 in the presence of epinephrine in the concentration range of 0 – 1000  $\mu\text{M}$  after 20min.

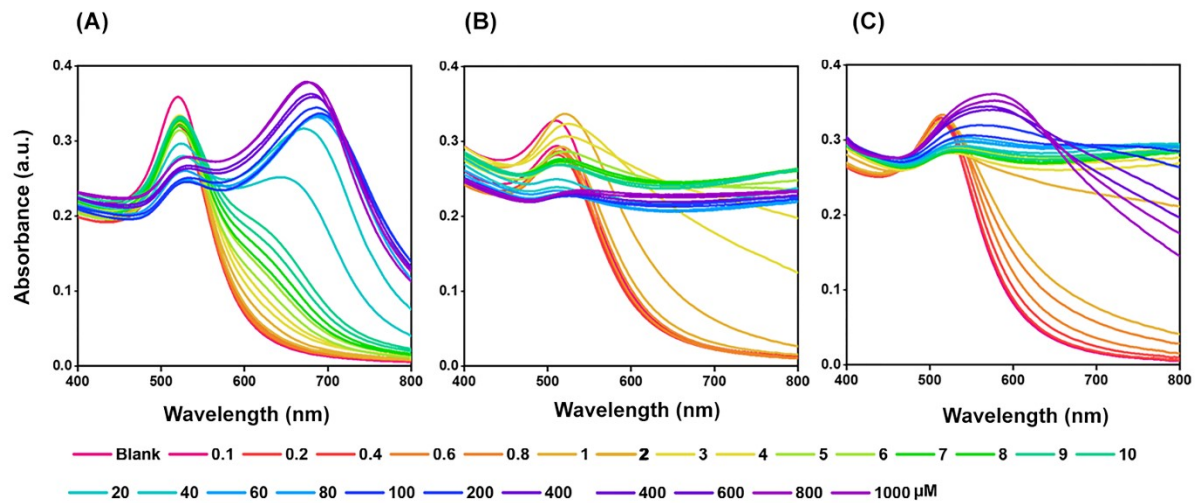

**Fig. S9.** UV-Vis spectra of **(A)** SE1 **(B)** SE2, and **(C)** SE3 in the presence of norepinephrine in the concentration range of 0 – 1000  $\mu\text{M}$  after 20min.

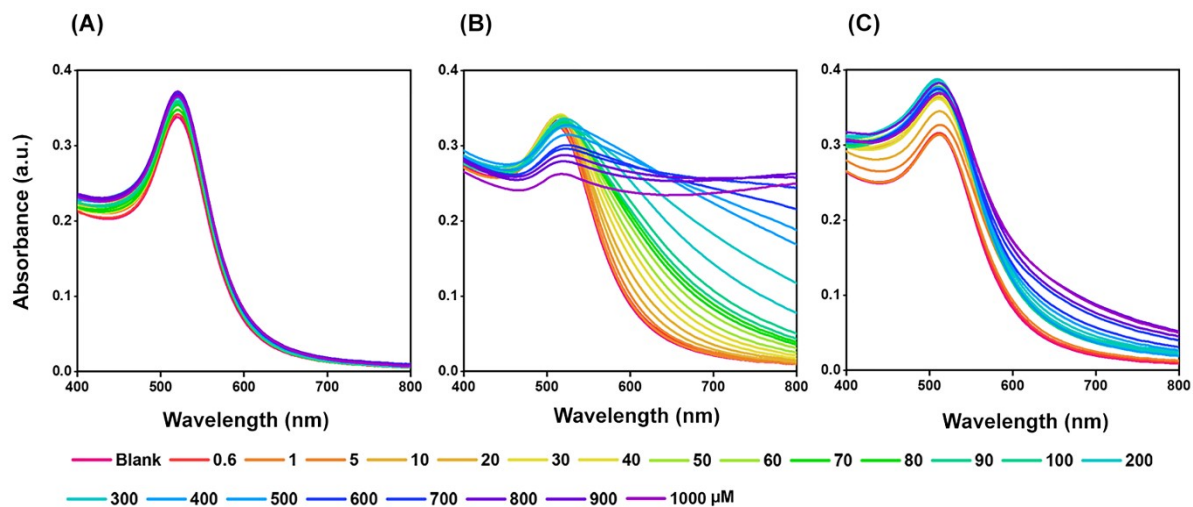

**Fig. S10.** UV-Vis spectra of **(A)** SE1 **(B)** SE2, and **(C)** SE3 in the presence of levodopa in the concentration range of 0 – 1000  $\mu\text{M}$  after 20min.

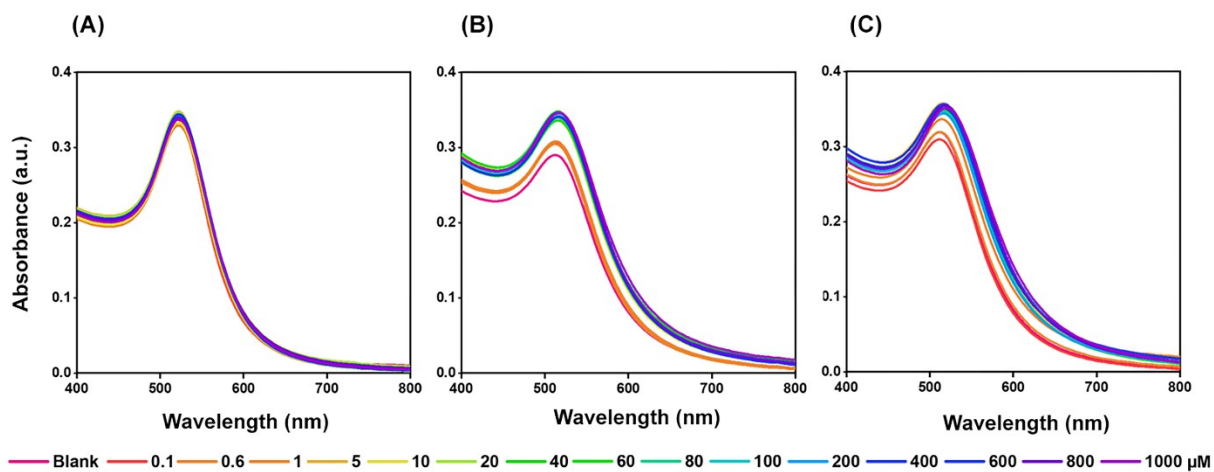

**Fig. S11.** UV-Vis spectra of (A) SE1 (B) SE2, and (C) SE3 in the presence of uric acid in the concentration range of 0 – 1000  $\mu\text{M}$  after 20min.

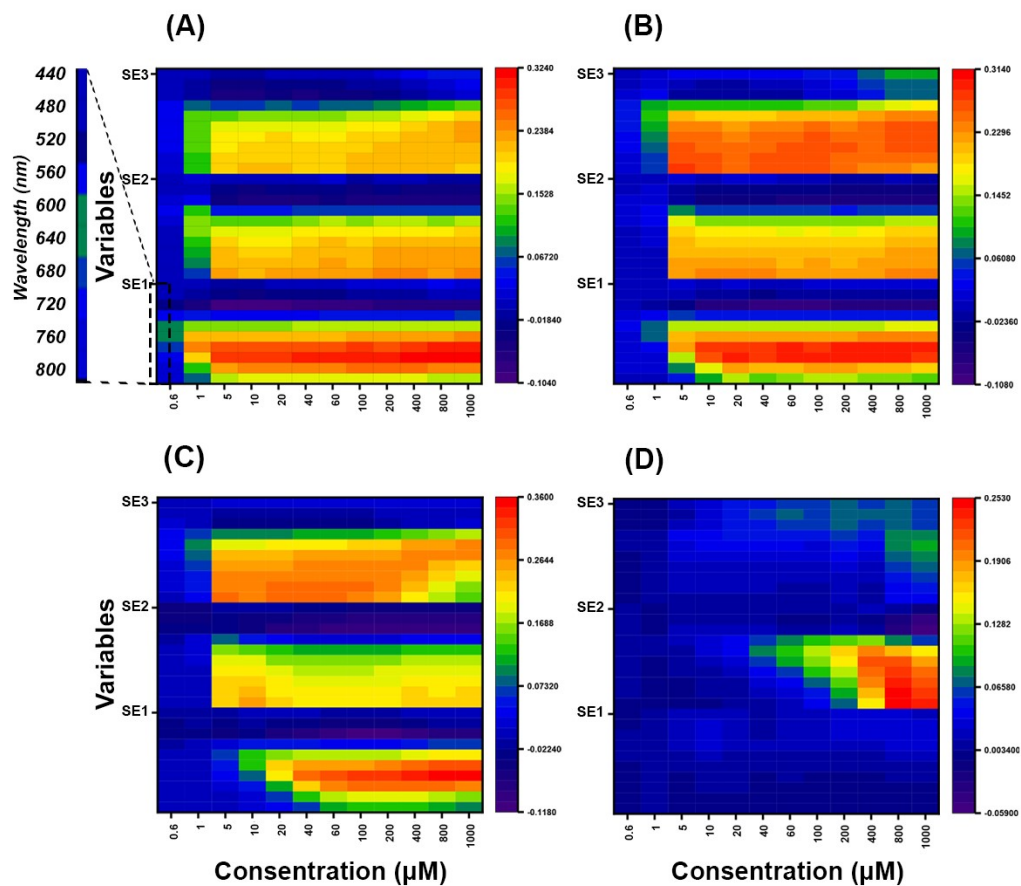

**Fig. S12.** Heatmap showing cross-reactivity in the arrays' response. Visual encoding of the arrays' response at different concentrations for **(A)** DA, **(B)** EP, **(C)** NEP, and **(D)** LD.



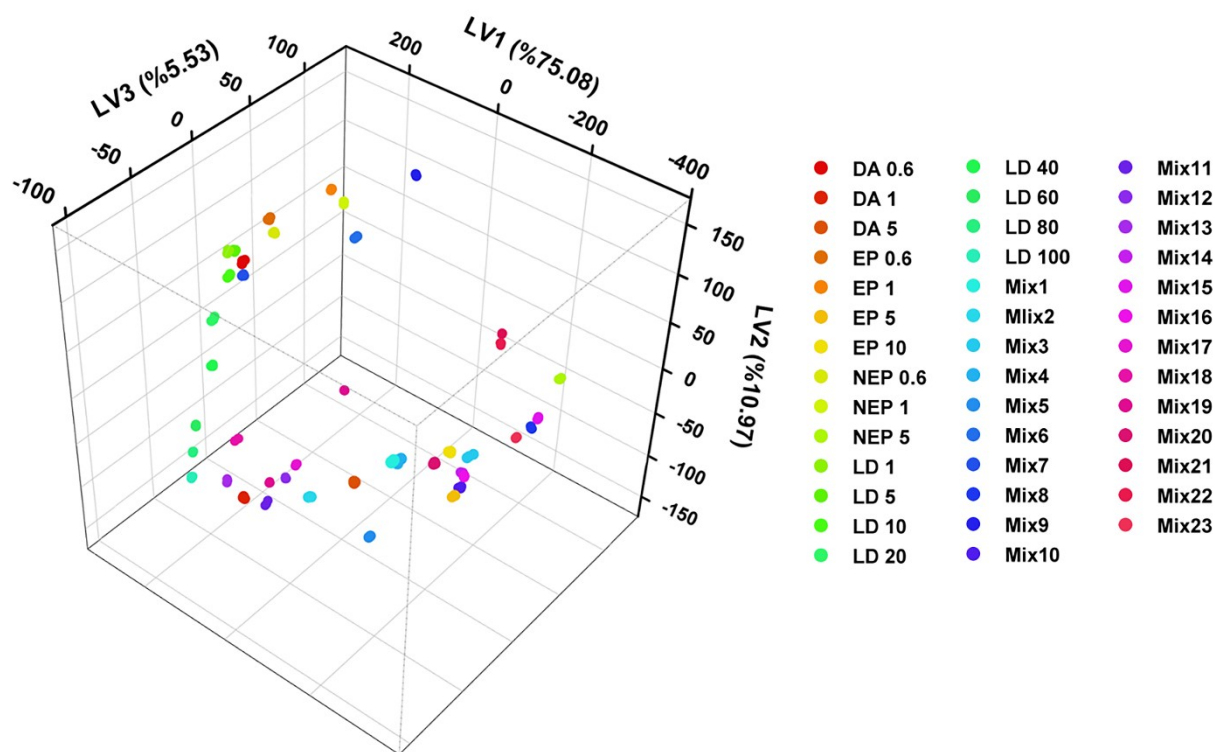

**Fig. S13.** 3D LDA score plot showing the discrimination between pure and mixture forms of the CNs (**Mix1** DA5:EP5; **Mix2** DA1:EP5; **Mix3** DA1:NEP5; **Mix4** DA5:NEP1; **Mix5** DA1:NEP0.6; **Mix6** DA0.6:NEP0.6; **Mix7** DA0.6:EP0.6; **Mix8** EP5:NEP5; **Mix9** EP0.6:NEP1; **Mix10** EP10:NEP1; **Mix11** DA1:LD100; **Mix12** EP5:LD60; **Mix13** NEP1:LD80; **Mix14** DA1:EP1:NEP1; **Mix15** DA0.6:EP1:NEP5; **Mix16** DA1:EP0.6:NEP1; **Mix17** DA1:EP0.6:LD20; **Mix18** EP0.6:NEP0.6:LD40; **Mix19** DA0.6:NEP1:LD80; **Mix20** DA5:EP5:NEP5:LD5; **Mix21** DA1:EP1:NEP1:LD10; **Mix22** DA0.6:EP0.6:NEP1:LD5; **Mix23** DA1:EP0.6:NEP1:LD1). Concentrations are given in  $\mu\text{M}$ .

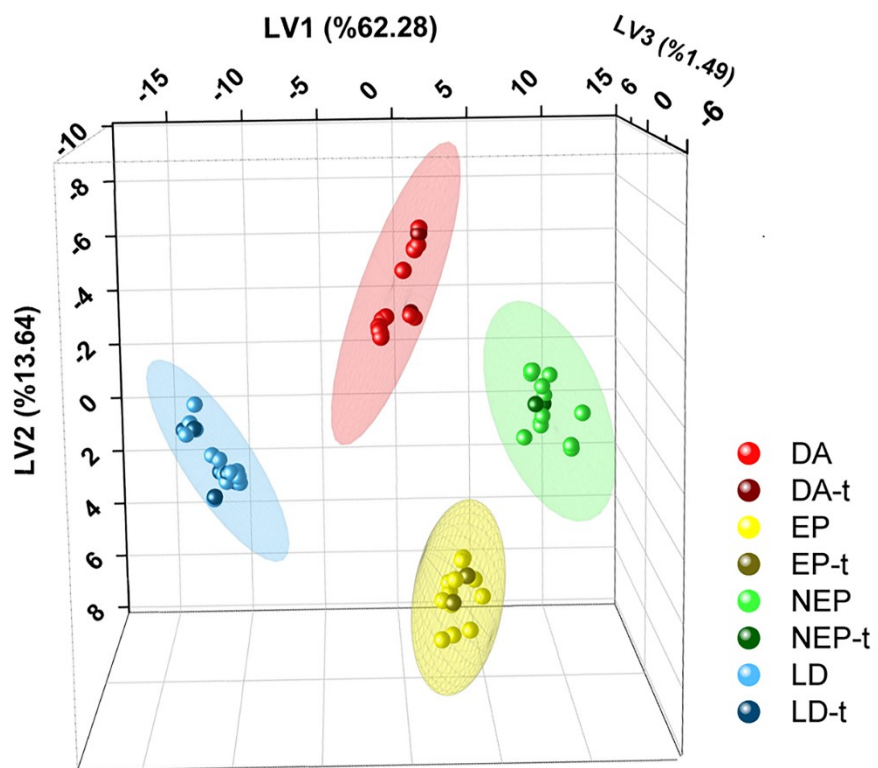

**Fig. S14.** 3D LDA score plot showing the discrimination between the analytes in their concentration ranges: **DA** (1 - 12); **EP** (3.6 - 9); **NEP** (3 - 12); and **LD** (10 - 70) in the human urine sample. Concentrations are given in  $\mu\text{M}$ . Samples with the symbol -t were introduced into the LDA analysis in the form of a test set matrix.

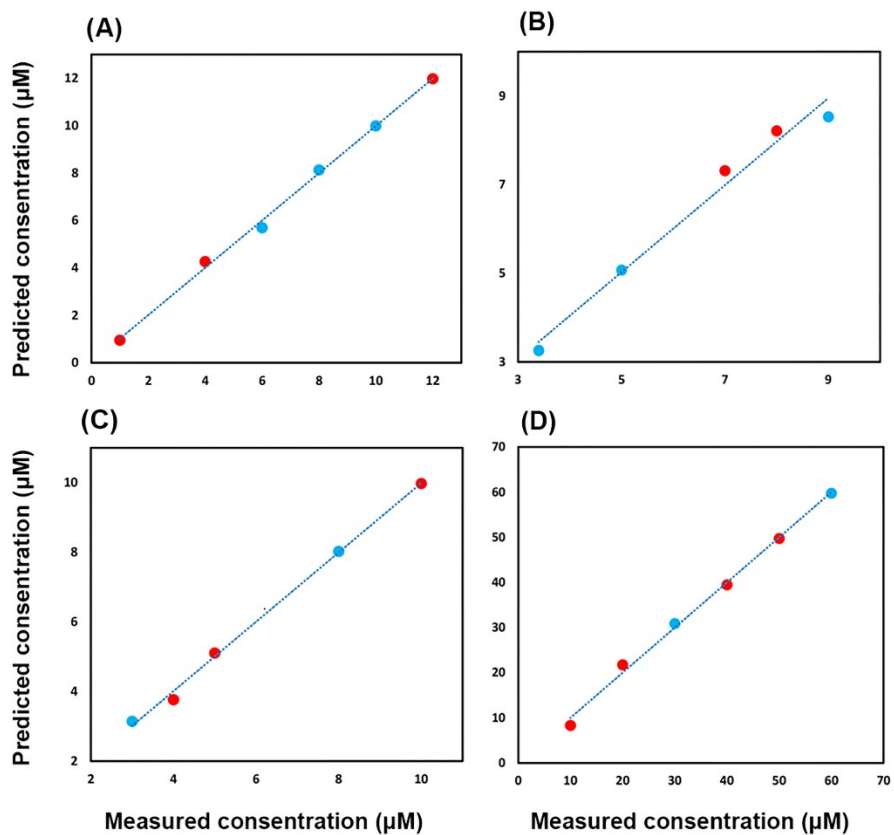

**Fig. S15.** Multivariate calibration of catecholamine neurotransmitters in the human urine sample with PLSR. The predicted versus measured concentrations for **(A)** DA, **(B)** EP, **(C)** NEP, and **(D)** LD. The data was randomly split into 80% calibration (red spots) and 20% prediction (blue spots) sets.

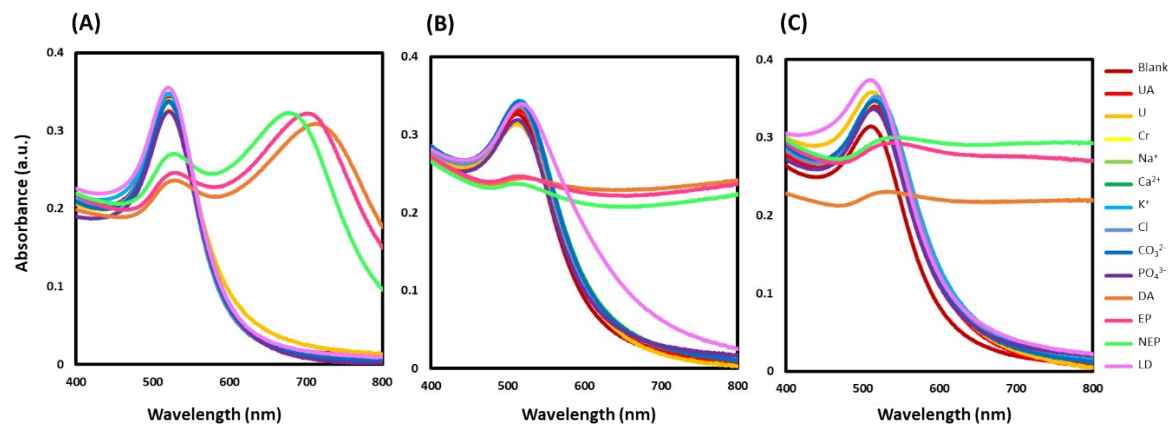

**Fig. S16.** UV-Vis spectra of (A) SE1 (B) SE2, and (C) SE3 in the presence of 50  $\mu\text{M}$  uric acid(UA, red), urea (U, light orange), creatinine (Cr, yellow), sodium ( $\text{Na}^+$ , light green), calcium ( $\text{Ca}^{2+}$ , dark green), potassium ( $\text{K}^+$ , light blue), chloride ( $\text{Cl}^-$ , light purple), carbonate ( $\text{CO}_3^{2-}$ , dark blue), , phosphate ( $\text{PO}_4^{3-}$ , purple), dopamine (DA, dark orange), epinephrine (EP, dark pink), norepinephrine (NEP, neon green) and levodopa (LD, pink) after 20min.

**Table S1.** Concentration of CNs in Real sample analysis.

| <b>Target analyte</b> | <b>Volume (<math>\mu\text{L}</math>) of 1 mM analyte which is added to 80 <math>\mu\text{L}</math> of urine in a 5 mL volumetric flask</b> | <b>concentration (<math>\mu\text{M}</math>) of analyte in the prepared urine sample</b> | <b>Final concentration (<math>\mu\text{M}</math>) of CNs in probe</b> |
|-----------------------|--------------------------------------------------------------------------------------------------------------------------------------------|-----------------------------------------------------------------------------------------|-----------------------------------------------------------------------|
| <b>DA</b>             | 20                                                                                                                                         | 4                                                                                       | 1                                                                     |
|                       | 80                                                                                                                                         | 16                                                                                      | 4                                                                     |
|                       | 120                                                                                                                                        | 24                                                                                      | 6                                                                     |
|                       | 160                                                                                                                                        | 32                                                                                      | 8                                                                     |
|                       | 200                                                                                                                                        | 40                                                                                      | 10                                                                    |
|                       | 240                                                                                                                                        | 48                                                                                      | 12                                                                    |
| <b>EP</b>             | 68                                                                                                                                         | 13.6                                                                                    | 3.4                                                                   |
|                       | 100                                                                                                                                        | 20                                                                                      | 5                                                                     |
|                       | 140                                                                                                                                        | 28                                                                                      | 7                                                                     |
|                       | 160                                                                                                                                        | 32                                                                                      | 8                                                                     |
|                       | 360                                                                                                                                        | 72                                                                                      | 9                                                                     |
| <b>NEP</b>            | 60                                                                                                                                         | 12                                                                                      | 3                                                                     |
|                       | 80                                                                                                                                         | 16                                                                                      | 4                                                                     |
|                       | 100                                                                                                                                        | 20                                                                                      | 5                                                                     |
|                       | 160                                                                                                                                        | 32                                                                                      | 8                                                                     |
|                       | 200                                                                                                                                        | 40                                                                                      | 10                                                                    |
| <b>LD</b>             | 200                                                                                                                                        | 40                                                                                      | 10                                                                    |
|                       | 400                                                                                                                                        | 80                                                                                      | 20                                                                    |
|                       | 600                                                                                                                                        | 120                                                                                     | 30                                                                    |
|                       | 800                                                                                                                                        | 160                                                                                     | 40                                                                    |
|                       | 1000                                                                                                                                       | 200                                                                                     | 50                                                                    |
|                       | 1200                                                                                                                                       | 240                                                                                     | 60                                                                    |

**Table S2.** Sensing strategies for determination of CNs.

| No. | Method                                      | analyte | Linear range                                                             | LOD                                                               | Simultaneous | Naked-eye | pH  | time                           | Real sample                                             | Reverence |
|-----|---------------------------------------------|---------|--------------------------------------------------------------------------|-------------------------------------------------------------------|--------------|-----------|-----|--------------------------------|---------------------------------------------------------|-----------|
| 1   | HPLC-FLD                                    | DA      | 0.05–6.0 $\mu\text{M}$                                                   | 0.5 nM                                                            | -            | -         | 8.0 | Pretreatment time (h) + 15 min | Human serum and urine                                   | 1         |
|     |                                             | EP      | 0.1–24.0 $\mu\text{M}$                                                   | 2.0 nM                                                            |              |           |     |                                |                                                         |           |
|     |                                             | NEP     | 0.01–10.0 $\mu\text{M}$                                                  | 1.0 nM                                                            |              |           |     |                                |                                                         |           |
|     |                                             | LD      | 0.025–6.0 $\mu\text{M}$                                                  | 5.0 nM                                                            |              |           |     |                                |                                                         |           |
| 2   | CE-LIF                                      | 5-HT    | 0.5-500 $\mu\text{M}$                                                    | 0.3 nM                                                            | -            | -         | 8.0 | Pretreatment time (h) + 10 min | Human serum and urine                                   | 1         |
|     |                                             | Tyr     | 0.05-50 $\mu\text{M}$                                                    | 0.02 nM                                                           |              |           |     |                                |                                                         |           |
|     |                                             | DA      | 0.5-500 $\mu\text{M}$                                                    | 0.2 nM                                                            |              |           |     |                                |                                                         |           |
| 3   | HPLC-MS                                     | DA      | -                                                                        | 0.04 $\mu\text{M}$                                                | -            | -         | 7.4 | Pretreatment time (h) + 20 min | Human blood                                             | 2         |
|     |                                             | EP      | 0-0.35 $\mu\text{M}$                                                     | 0.01 $\mu\text{M}$                                                |              |           |     |                                |                                                         |           |
|     |                                             | NEP     | -                                                                        | 0.06 $\mu\text{M}$                                                |              |           |     |                                |                                                         |           |
|     |                                             | 5-HT    | 0 – 1.42 $\mu\text{M}$                                                   | 0.01 $\mu\text{M}$                                                |              |           |     |                                |                                                         |           |
| 4   | HPLC-FLD                                    | DA      | 0.002–0.5 $\mu\text{M}$                                                  | 0.1 nM                                                            | -            | -         | 7.6 | Pretreatment time (h) + 40 min | Liver sample and brain sample                           | 3         |
|     |                                             | EP      | 0.002–1 $\mu\text{M}$                                                    | 0.4 nM                                                            |              |           |     |                                |                                                         |           |
|     |                                             | NEP     | 0.002–1 $\mu\text{M}$                                                    | 0.4 nM                                                            |              |           |     |                                |                                                         |           |
|     |                                             | LD      | 0.004-0.2 $\mu\text{M}$                                                  | 1.45 nM                                                           |              |           |     |                                |                                                         |           |
|     |                                             | Tyr     | 0.002–0.5 $\mu\text{M}$                                                  | 0.17 nM                                                           |              |           |     |                                |                                                         |           |
|     |                                             | MN      | 0.002–0.2 $\mu\text{M}$                                                  | 0.1 nM                                                            |              |           |     |                                |                                                         |           |
| 5   | Electrochemical                             | SE      | -                                                                        | 0.31 $\mu\text{M}$                                                | *            | -         | 7.4 | -                              | -                                                       | 4         |
|     |                                             | EP      | -                                                                        | 0.27 $\mu\text{M}$                                                |              |           |     |                                |                                                         |           |
| 6   | Electrochemical                             | DA      | 0.1-700 $\mu\text{M}$                                                    | 30 nM                                                             | -            | -         | 7.0 | -                              | DA ampoule<br>AA ampoule<br>Urine samples               | 5         |
|     |                                             | AA      | -                                                                        | -                                                                 |              |           |     |                                |                                                         |           |
|     |                                             | UA      | -                                                                        | -                                                                 |              |           |     |                                |                                                         |           |
| 7   | Electrochemical                             | DA      | 3–30 $\mu\text{M}$                                                       | 2.67 $\mu\text{M}$                                                | *            | -         | 7.0 | -                              | Human serum<br>urine samples<br>multivitamin<br>tablets | 6         |
|     |                                             | AA      | 25–300 $\mu\text{M}$                                                     | 23.38 $\mu\text{M}$                                               |              |           |     |                                |                                                         |           |
|     |                                             | UA      | 5–70 $\mu\text{M}$                                                       | 4.70 $\mu\text{M}$                                                |              |           |     |                                |                                                         |           |
| 8   | Electrochemical                             | DA      | 0.1-5 $\mu\text{M}$                                                      | 0.1 $\mu\text{M}$                                                 | -            | -         | 7.0 | <1s                            | -                                                       | 7         |
| 9   | Electrochemical                             | Ep      | 3-100 $\mu\text{M}$                                                      | 3 $\mu\text{M}$                                                   | -            | -         | 8.0 | -                              | -                                                       | 8         |
| 10  | Optical<br>(colorimetry and<br>Fluorimetry) | EP      | $^{\text{c}}$ 20-500 $\mu\text{M}$<br>$^{\text{f}}$ 0.5-30 $\mu\text{M}$ | $^{\text{c}}$ 10 $\mu\text{M}$<br>$^{\text{f}}$ 0.2 $\mu\text{M}$ | -            | *         | 7.0 | 30 min                         | Artificial urine                                        | 9         |

|           |                                              |              |                                                                            |                                                                     |   |   |                |        |                                                     |            |
|-----------|----------------------------------------------|--------------|----------------------------------------------------------------------------|---------------------------------------------------------------------|---|---|----------------|--------|-----------------------------------------------------|------------|
| <b>11</b> | Optical<br>(nanozymes based-<br>Colorimetry) | AA<br>2,4-DP | 0–25 $\mu\text{M}$<br>3.1–122.7 and<br>122.7–613.5 $\mu\text{M}$           | 0.29 $\mu\text{M}$<br>0.76 $\mu\text{M}$                            | - | * | 4.0            | 3 min  | Vegetables,<br>fruits,<br>beverages,<br>human serum | <u>10</u>  |
|           |                                              | EP           | 41.09–109.2 and<br>109.2–272.93 $\mu\text{M}$                              | 0.70 $\mu\text{M}$                                                  |   |   | 6.0            | 3min   |                                                     |            |
| <b>12</b> | Optical<br>(photoluminescent)                | DA           | 0.1–50 $\mu\text{M}$                                                       | 10 nM                                                               | - | - | 8.9            | 1 h    | Urine                                               | <u>11</u>  |
| <b>13</b> | Optical<br>(Colorimetry)                     | EP           | 5.5-6.5 $\mu\text{M}$                                                      | 1.3 $\mu\text{M}$                                                   | - | - | alkaline       | -      | -                                                   | <u>12</u>  |
| <b>14</b> | Optical<br>(Colorimetry)                     | EP           | 1–400 $\mu\text{M}$                                                        | 0.6 $\mu\text{M}$                                                   | - | * | -              | 10 min | -                                                   | <u>13</u>  |
| <b>15</b> | Optical<br>(Colorimetry and<br>Fluorimetry)  | NEP          | <sup>c</sup> 56.6-8920 $\mu\text{M}$<br><sup>f</sup> 0.067-1 $\mu\text{M}$ | <sup>c</sup> 5.59 $\mu\text{M}$<br><sup>f</sup> 0.018 $\mu\text{M}$ | - | * | -              | 2 min  | Synthetic blood<br>serum                            | <u>14</u>  |
| <b>16</b> | Optical<br>(Colorimetry)                     | DA           | 3.2-20 $\mu\text{M}$                                                       | 1.2 $\mu\text{M}$                                                   | * | * | -              | -      | Ringer's<br>injection serum                         | <u>15</u>  |
|           |                                              | LD           | 0.16-10 $\mu\text{M}$                                                      | 0.086 $\mu\text{M}$                                                 |   |   |                |        |                                                     |            |
|           |                                              | EP           | 1.5-40 $\mu\text{M}$                                                       | 0.97 $\mu\text{M}$                                                  |   |   |                |        |                                                     |            |
| <b>17</b> | Optical<br>(Colorimetry)                     | LD           | 50.7-202.8 $\mu\text{M}$                                                   | 3.04 $\mu\text{M}$                                                  | - | * | -              | -      | -                                                   | <u>16</u>  |
| <b>18</b> | Optical<br>(Colorimetry array)               | DA           | 6.53-195.84 $\mu\text{M}$                                                  | 32.64 $\mu\text{M}$                                                 | * | * | 7.0            | 20 min | Human Urine                                         | <u>17</u>  |
|           |                                              | EP           | 54.58-163.75 $\mu\text{M}$                                                 | 5.46 $\mu\text{M}$                                                  |   |   |                |        |                                                     |            |
|           |                                              | NEP          | 59.10-118.22 $\mu\text{M}$                                                 | 5.91 $\mu\text{M}$                                                  |   |   |                |        |                                                     |            |
| <b>19</b> | Optical<br>(Fluorimetry array)               | DA           | 1.63-65.28 $\mu\text{M}$                                                   | 1.63 $\mu\text{M}$                                                  | * | * | 7.0            | 5 min  | Human Urine                                         | <u>18</u>  |
|           |                                              | EP           | 1.36-54.58 $\mu\text{M}$                                                   | 0.0027 $\mu\text{M}$                                                |   |   |                |        |                                                     |            |
|           |                                              | NEP          | 1.48-59.11 $\mu\text{M}$                                                   | 0.0029 $\mu\text{M}$                                                |   |   |                |        |                                                     |            |
| <b>20</b> | Optical<br>(Colorimetry array)               | DA           | 0.6-9 $\mu\text{M}$                                                        | 0.3 Mm                                                              | * | * | 4.5 and<br>7.0 | 20 min | Human Urine                                         | This study |
|           |                                              | EP           | 0.1-10 $\mu\text{M}$                                                       | 0.5 $\mu\text{M}$                                                   |   |   |                |        |                                                     |            |
|           |                                              | NEP          | 0.1-9 $\mu\text{M}$                                                        | 0.2 $\mu\text{M}$                                                   |   |   |                |        |                                                     |            |
|           |                                              | LD           | 1-70 $\mu\text{M}$                                                         | 1.9 $\mu\text{M}$                                                   |   |   |                |        |                                                     |            |

**Table S3.** Classification and Jackknifed classification matrix for the discrimination of mixtures of analytes with the following components (**Mix1** DA5:EP5; **Mix2** DA1:EP5; **Mix3** DA1:NEP5; **Mix4** DA5:NEP1; **Mix5** DA1:NEP0.6; **Mix6** DA0.6:NEP0.6; **Mix7** DA0.6:EP0.6; **Mix8** EP5:NEP5; **Mix9** EP0.6:NEP1; **Mix10** EP10:NEP1; **Mix11** DA1:LD100; **Mix12** EP5:LD60; **Mix13** NEP1:LD80; **Mix14** DA1:EP1:NEP1; **Mix15** DA0.6:EP1:NEP5; **Mix16** DA1:EP0.6:NEP1; **Mix17** DA1:EP0.6:LD20; **Mix18** EP0.6:NEP0.6:LD40; **Mix19** DA0.6:NEP1:LD80; **Mix20** DA5:EP5:NEP5:LD5; **Mix21** DA1:EP1:NEP1:LD10; **Mix22** DA0.6:EP0.6:NEP1:LD5; **Mix23** DA1:EP0.6:NEP1:LD1).











**Table S4.** Classification and Jackknifed classification matrix for the discrimination of all analytes in their entire concentration range (**DA** 1 – 12  $\mu\text{M}$ ; **EP** 3.6 – 9  $\mu\text{M}$ ; **NEP** 3 – 12  $\mu\text{M}$ ; and **LD** 10 - 70

| Classification Matrix            |    |    |     |    |       |             |             |
|----------------------------------|----|----|-----|----|-------|-------------|-------------|
| Analytes                         | DA | EP | NEP | LD | Total | Sensitivity | Specificity |
| DA                               | 13 | 0  | 0   | 0  | 13    | 100         | 100         |
| EP                               | 0  | 13 | 0   | 0  | 13    | 100         | 100         |
| NEP                              | 0  | 0  | 13  | 0  | 13    | 100         | 100         |
| LD                               | 0  | 0  | 0   | 14 | 14    | 100         | 100         |
| Total                            | 13 | 13 | 13  | 14 | 53    | -           | -           |
| Jackknifed Classification Matrix |    |    |     |    |       |             |             |
| Analytes                         | DA | EP | NEP | LD | Total | Sensitivity | Specificity |
| DA                               | 13 | 0  | 0   | 0  | 13    | 100         | 100         |
| EP                               | 0  | 13 | 0   | 0  | 13    | 100         | 100         |
| NEP                              | 0  | 0  | 13  | 0  | 13    | 100         | 100         |
| LD                               | 0  | 0  | 0   | 14 | 14    | 100         | 100         |
| Total                            | 13 | 13 | 13  | 14 | 53    | -           | -           |

$\mu\text{M}$ ) in the human urine sample.

**Table S5.** Analytical figures of merit for multivariate calibration of DA, EP, NEP, and LD in a human

| Analyte | LVs | RMSEC  | RMSECV | RMSEP  | R <sup>2</sup> <sub>C</sub> | R <sup>2</sup> <sub>CV</sub> | R <sup>2</sup> <sub>P</sub> | SEN    | Anal. SEN | LOD <sub>min</sub><br>( $\mu$ M) | LOQ <sub>min</sub><br>( $\mu$ M) | Linear Range<br>( $\mu$ M) |
|---------|-----|--------|--------|--------|-----------------------------|------------------------------|-----------------------------|--------|-----------|----------------------------------|----------------------------------|----------------------------|
| DA      | 3   | 0.1777 | 0.2232 | 0.2686 | 0.9977                      | 0.9967                       | 0.9897                      | 0.0385 | 23.6819   | 0.3313                           | 0.9938                           | 1-12                       |
| EP      | 2   | 0.2808 | 0.3223 | 0.0855 | 0.9983                      | 0.9977                       | 1.000                       | 0.0505 | 18.6798   | 0.4604                           | 1.3812                           | 3.4-9                      |
| NEP     | 2   | 0.1366 | 0.1602 | 0.0428 | 0.9996                      | 0.9994                       | 1.000                       | 0.0485 | 24.3654   | 0.2248                           | 0.6745                           | 3-10                       |
| LD      | 2   | 1.1246 | 1.2804 | 1.3333 | 0.9992                      | 0.9989                       | 0.9991                      | 0.0031 | 2.6408    | 1.8603                           | 5.5808                           | 10-60                      |

urine sample with PLSR.

## References

1. L. Cao, L. Wu, H. Zhong, H. Wu, S. Zhang, J. Meng and F. Li, *Acta Chromatographica*, 2021.
2. V. Carrera, E. Sabater, E. Vilanova and M. A. Sogorb, *J. Chromatogr. B*, 2007, **847**, 88-94.
3. X. Huang, X.-F. Guo, H. Wang and H.-S. Zhang, *Arabian Journal of Chemistry*, 2019, **12**, 1159-1167.
4. R. banu, B. E. Kumara Swamy and E. Ebenso, *Inorganic Chemistry Communications*, 2022, **144**, 109868.
5. H. Moradpour and H. Beitollahi, *Journal*, 2022, **8**.
6. Z. Temoçin, *Sensors and Actuators B: Chemical*, 2013, **176**, 796-802.
7. E. Farjami, R. Campos, J. S. Nielsen, K. V. Gothelf, J. Kjems and E. E. Ferapontova, *Analytical chemistry*, 2013, **85**, 121-128.
8. D. Molinnus, A. Bartz, M. Bäcker, P. Siegert, H. Willenberg, A. Poghossian, M. Keusgen and M. J. Schöning, *Procedia Engineering*, 2015, **120**, 540-543.
9. U. Sivasankaran and K. Girish Kumar, *Spectrochimica Acta Part A: Molecular and Biomolecular Spectroscopy*, 2019, **223**, 117292.
10. X. Zhu, J. Tang, X. Ouyang, Y. Liao, H. Feng, J. Yu, L. Chen, Y. Lu, Y. Yi and L. Tang, *Biosensors and Bioelectronics*, 2022, **216**, 114652.
11. Q. Wang, K. Zheng, W. Zhang and M.-J. Li, *Journal of Inorganic Biochemistry*, 2022, **234**, 111902.
12. M. R. Siddiqui, M. Z. Rafiquee, S. M. Wabaidur, Z. A. Alothman, M. S. Ali and H. A. Allohedan, *Analytical sciences : the international journal of the Japan Society for Analytical Chemistry*, 2015, **31**, 437-443.
13. M. Zhang, Y. Zhang, C. Yang, C. Ma and J. Tang, *Talanta*, 2021, **224**, 121840.
14. S. Menon, A. R. Jose, S. Jesny and K. G. Kumar, *Analytical Methods*, 2016, **8**, 5801-5805.
15. M. R. Hormozi Nezhad, J. Tashkhourian and J. Khodaveisi, *Journal of the Iranian Chemical Society*, 2010, **7**, S83-S91.
16. M. Lettieri, R. Emanuele, S. Scarano, P. Palladino and M. Minunni, *Analytical and Bioanalytical Chemistry*, 2022, **414**, 1713-1722.
17. S. Jafarinejad, M. Ghazi-Khansari, F. Ghasemi, P. Sasanpour and M. R. Hormozi-Nezhad, *Sci. Rep.*, 2017, **7**, 8266.
18. S. Jafarinejad, A. Bigdeli, M. Ghazi-Khansari, P. Sasanpour and M. R. Hormozi-Nezhad, *ACS Chem Neurosci*, 2020, **11**, 25-33.
